# Supplementary material for: In vitro anti-trypanosomal activity of 3-(aryl)-6-piperazin1,2,4-triazolo[3,4- a ]phthalazines-loaded ultrathin polymeric particles: effect of polymer type and particle size
Source: Royal Society of Chemistry journal article supplement (doi:10.1039/d3pm00002h), 2024-01-01
Supplement: d3pm00002h1.pdf [file d3pm00002h1.pdf]

## SUPPORTING INFORMATION:

### ***In Vitro* Activity against Trypanosomatideos of Polymeric Micro/Nanoparticles Loaded with 3-(Aryl)-6-piperazin-1,2,4-triazolo[3,4-a]phthalazines: Effect of Polymer Chain, Particle-Size and Controlled Release**

Karina González,<sup>a,b</sup> Ender Medina,<sup>b</sup> Elena Aguilera,<sup>c</sup> Gema González,<sup>d,e</sup> Marcos A. Sabino,<sup>b\*</sup>  
Angel H. Romero<sup>c\*</sup>

<sup>a</sup>*Unidad de Química Medicinal, Facultad de Farmacia, Universidad Central de Venezuela, Los Chaguaramos, 1041-A Caracas, Venezuela.*

<sup>b</sup>*Grupo de Investigación B5IDA, Departamento de Química, Universidad Simón Bolívar, Sartenejas, 1080 Caracas, Venezuela.*

<sup>c</sup>*Grupo de Química Orgánica Medicinal, Instituto de Química Biológica, Facultad de Ciencias, Universidad de la República, Iguá 4225, 11400 Montevideo, Uruguay.*

<sup>d</sup>*Centro de Ingeniería de Materiales y Nanotecnología, Laboratorio de Materiales, Instituto Venezolano de Investigaciones Científicas (IVIC), Carretera Panamericana Km 11, 20632 Caracas, Venezuela.*

<sup>e</sup>*Current affiliation: Escuela de Física y Nanotecnología, Universidad Yachay, Ecuador.*

**\*Corresponding authors:** A.H. Romero (angel.ucv.usb@gmail.com; aromero@fcien.edu.uy), M.A. Sabino (msabinog@gmail.com)

TEM Images for NP-based TF1 and TF2.....S2-S6

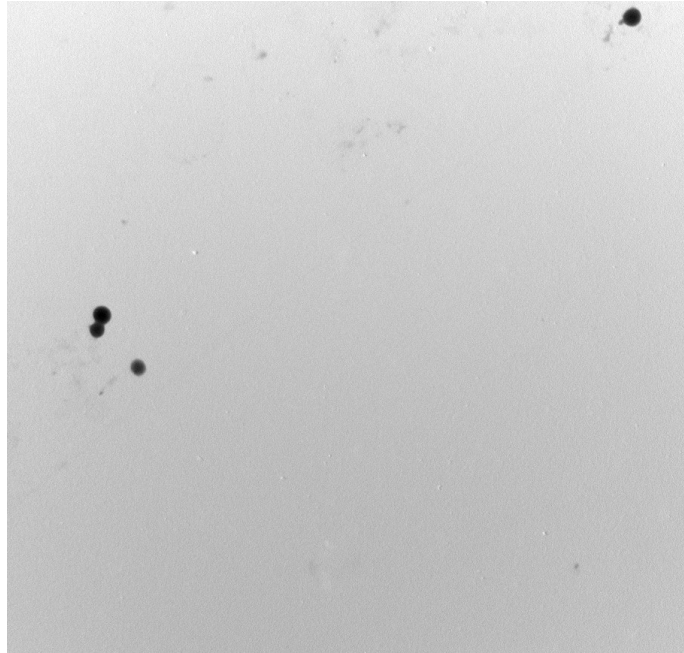

Muestra 3NO - 03

Print Mag = 447x @ 6.99999969005585 mm  
Acquired Nov 11 2020 at 4:12 p.m.

2 microns

HV=100kV  
TEM Mag = 8000x  
X = Y =  
AMT Preferred Customer

**Figure S1. TEM for PLGA-TF1.**

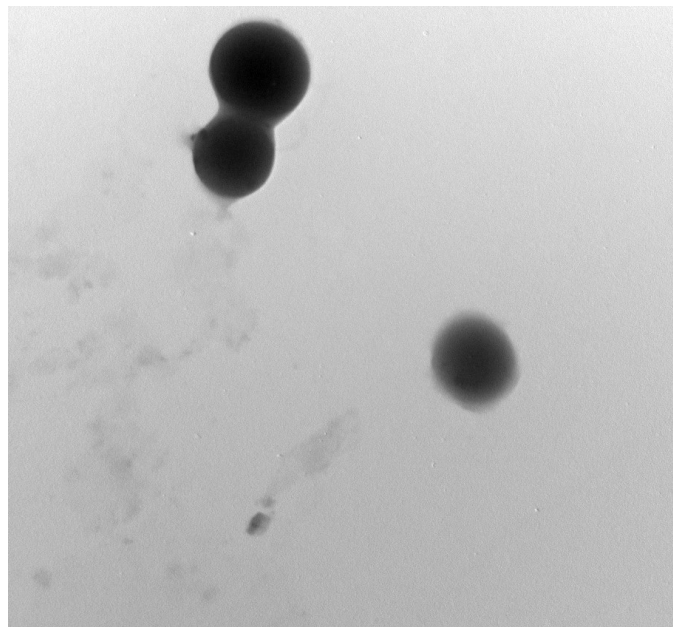

Muestra 3NO - 04

Print Mag = 2796x @ 6.99999969005585 mm  
Acquired Nov 11 2020 at 4:15 p.m.

500 nm

HV=100kV  
TEM Mag = 50000x  
X = Y =  
AMT Preferred Customer

**Figure S2. TEM for PLGA-TF1.**

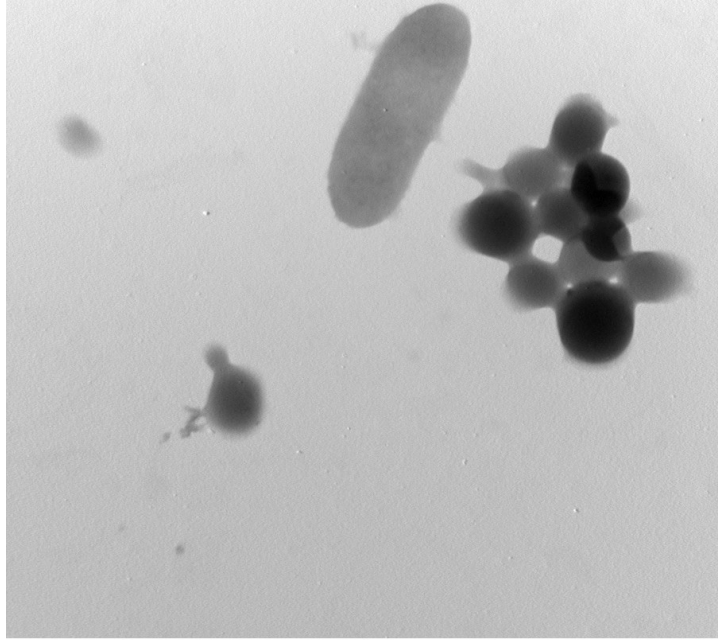

Muestra 3NO - 05

Print Mag = 1398x @ 6.99999969005585 mm  
Acquired Nov 11 2020 at 4:17 p.m.

500 nm

HV=100kV  
TEM Mag = 25000x  
X = Y =  
AMT Preferred Customer

**Figure S3. TEM for PLGA-TF1.**

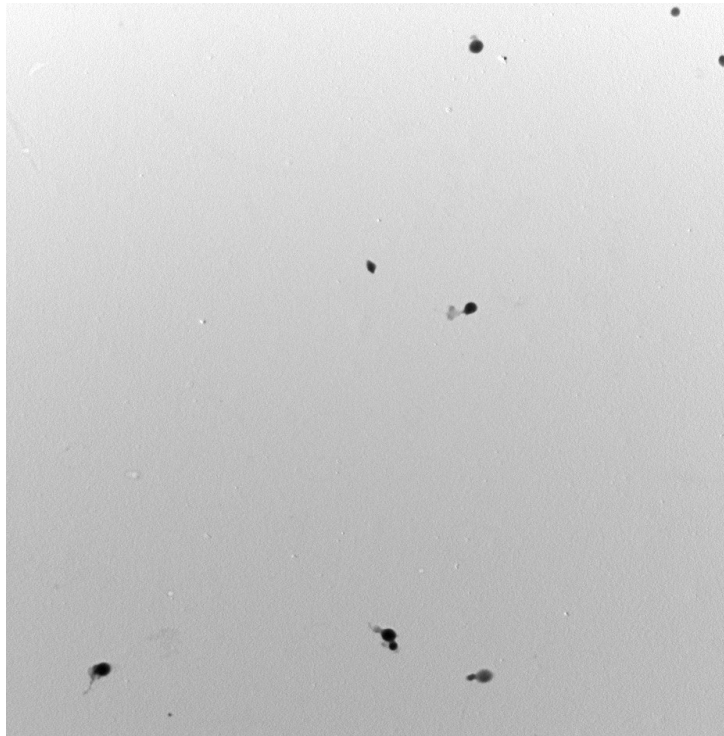

Muestra 3NO - 06

Print Mag = 280x @ 6.99999969005585 mm  
Acquired Nov 11 2020 at 4:20 p.m.

2 microns

HV=100kV  
TEM Mag = 5000x  
X = Y =  
AMT Preferred Customer

**Figure S4. TEM for PLGA-TF1.**

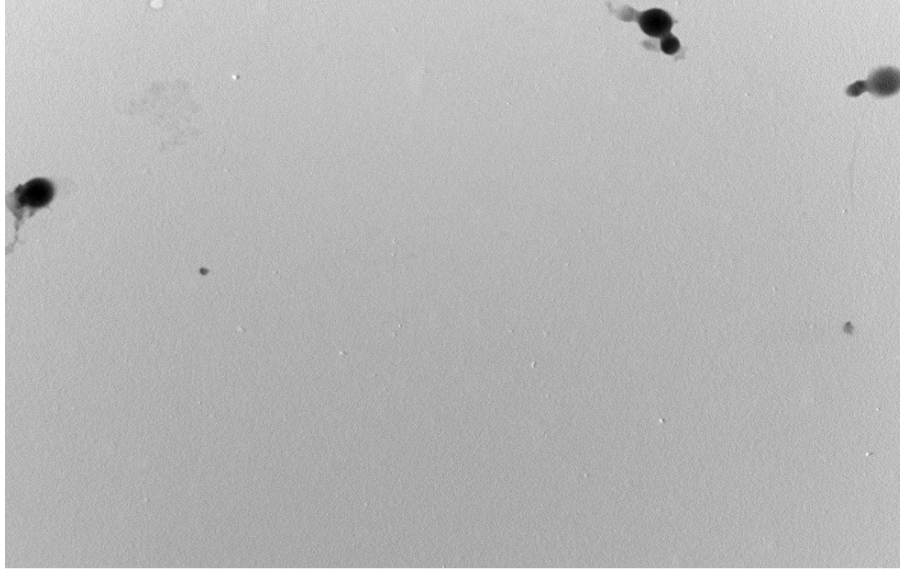

Muestra 3NO - 07

Print Mag = 559x @ 6.99999969005585 mm  
Acquired Nov 11 2020 at 4:21 p.m.

2 microns

HV=100kV  
TEM Mag = 10000x  
X = Y =  
AMT Preferred Customer

**Figure S5. TEM for PLGA-TF1.**

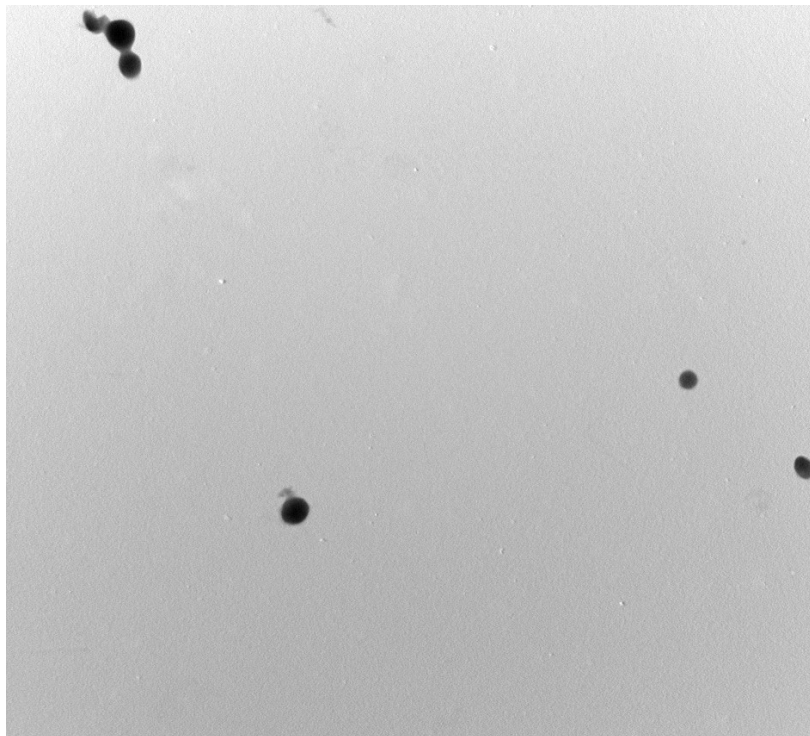

Muestra 3NO - 08

Print Mag = 559x @ 6.99999969005585 mm  
Acquired Nov 11 2020 at 4:22 p.m.

2 microns

HV=100kV  
TEM Mag = 10000x  
X = Y =  
AMT Preferred Customer

**Figure S6. TEM for PLGA-TF1.**

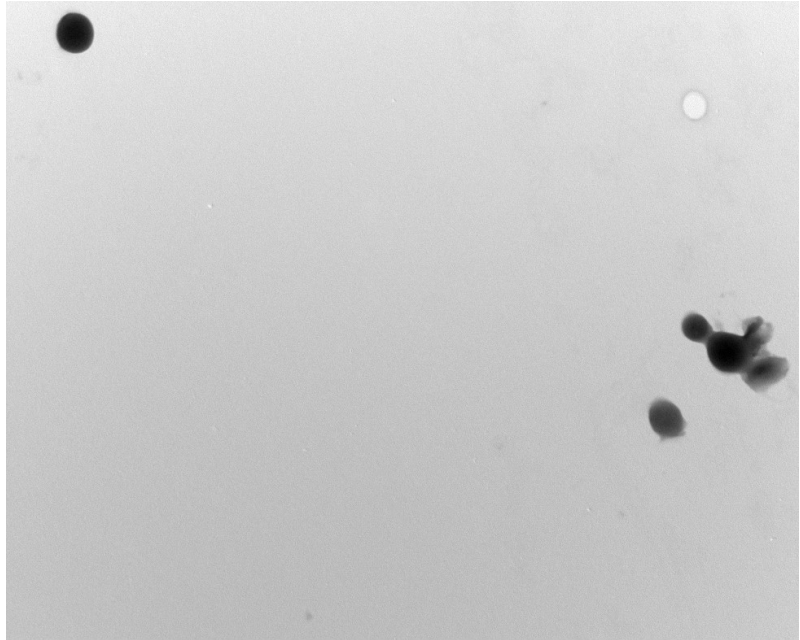

Muestra 3NO - 01

Print Mag = 839x @ 6.99999969005585 mm  
Acquired Nov 11 2020 at 4:09 p.m.

500 nm

HV=100kV  
TEM Mag = 15000x  
X = Y =  
AMT Preferred Customer

**Figure S7. TEM for PLGA-TF1.**

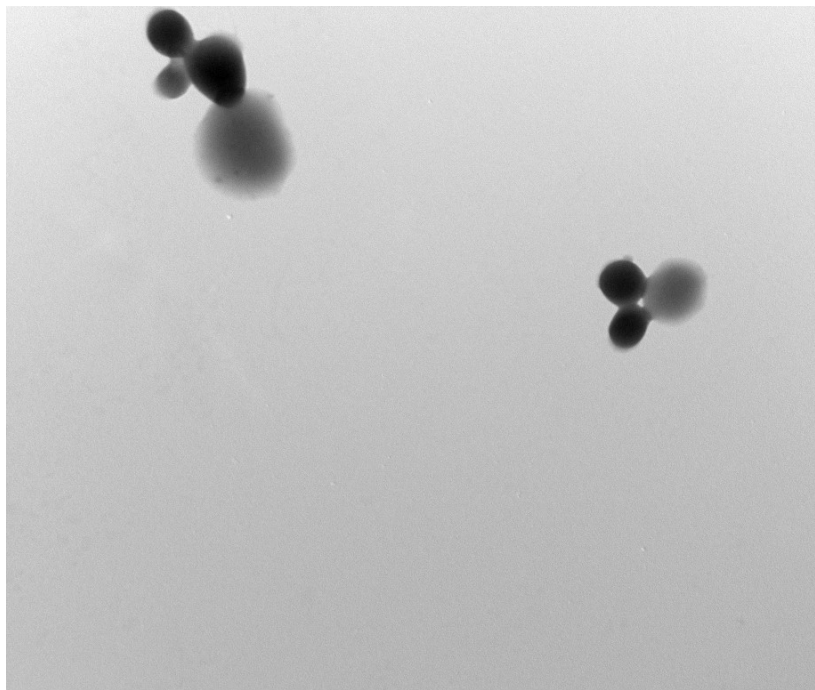

Muestra 3NO - 02

Print Mag = 839x @ 6.99999969005585 mm  
Acquired Nov 11 2020 at 4:10 p.m.

500 nm

HV=100kV  
TEM Mag = 15000x  
X = Y =  
AMT Preferred Customer

**Figure S8. TEM for PLGA-TF1.**

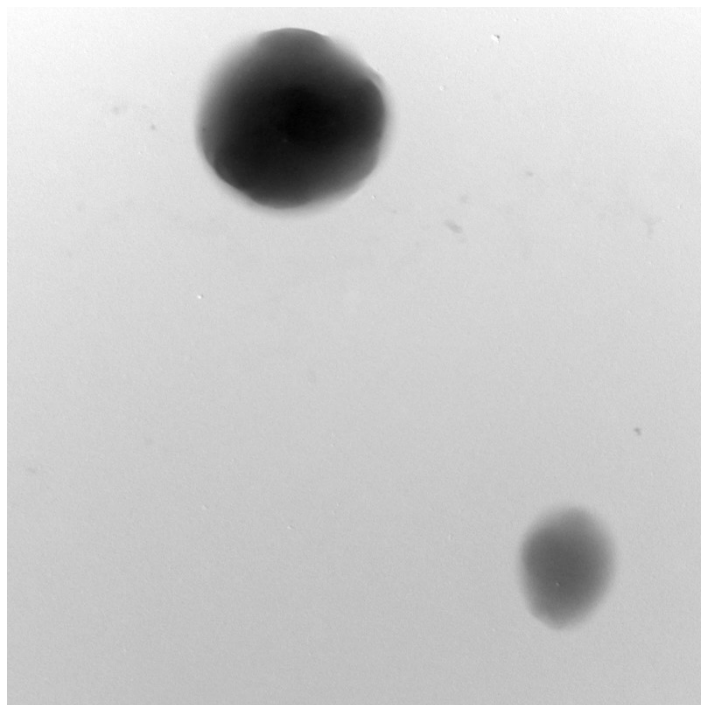

Muestra 4F - 01

Print Mag = 2796x @ 6.99999969005585 mm  
Acquired Nov 11 2020 at 3:53 p.m.

500 nm

HV=100kV

TEM Mag = 50000x

X = Y =

AMT Preferred Customer

**Figure S9. TEM for PLGA-TF2**
